# Supplementary material
Source: publisher site journal article supplement (https://www.dovepress.com/get_supplementary_file.php?f=383812.docx)
Supplement: Supplementary file 1 [file get_supplementary_file.php]

**Supplementary Digital Content**

**Mast cell specific receptor Mrgprb2 regulating experimental colitis is associated with the microbiota-gut-brain axis**

Ming Shao 1,2, Fangting Yuan1,2, Jingwen Liu1,2, Hesheng Luo1,2

1 Department of Gastroenterology, Renmin Hospital of Wuhan University, Wuhan 430060, China

2 Hubei Key Laboratory of Digestive Diseases, Wuhan 430060, China

Ming Shao 1,2
Fangting Yuan1,2

These authors contributed equally to this work

Correspondence: Hesheng Luo

Department of Gastroenterology, Renmin Hospital of Wuhan University, Wuhan 430060, China

Hubei Key Laboratory of Digestive Diseases, Wuhan 430060, China

Email: whdxxhnklhs@whu.edu.cn

**Supplementary Figures**

**Figure 1** Changes in the composition of intestinal flora. (A, B) Analysis of microbiota between control group and b2KO group at the phylum and genus level on day21, 42 and 63. (C, D) Analysis of microbiota between DSS group and b2KODSS group at the phylum and genus level on day21, 42 and 63. All data were expressed as mean ± SD (In DSS group, Day 21 n=11, Day 42 n=10, Day 63 n=8. Other groups n = 8). Statistical significance was indicated as follows: ** p < 0.01, *** p < 0.001，and **** p < 0.0001.





**A**





**B**





**C**





**D**
